# Supplementary material for: Nonlinear imaging and vibrational spectroscopic analysis of cellulosic fibres treated with COEX® flame-retardant for tapestry preservation
Source: Royal Society of Chemistry journal article supplement (doi:10.1039/d2ra02384a), 2022-01-01
Supplement: d2ra02384a1.pdf [file d2ra02384a1.pdf]

## Supplementary Material

The 8-bit grey-scale images of red and green individual channels (red = SHG, and green = TPEF) show the contribution of SHG and TPEF signals as the intensity of light at each pixel in the dynamic range 0-255.

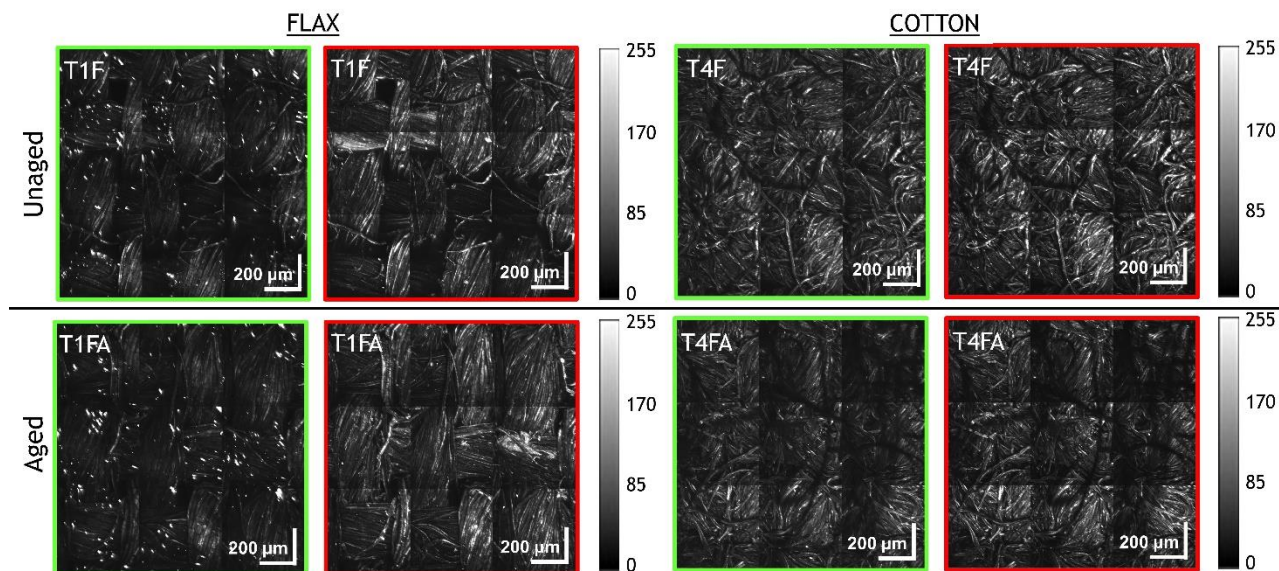

Fig. SM1. SHG and TPEF signal intensity measured on flax and cotton samples before (T1F, T4F) and after (T1FA, T4FA) the photo-induced ageing.

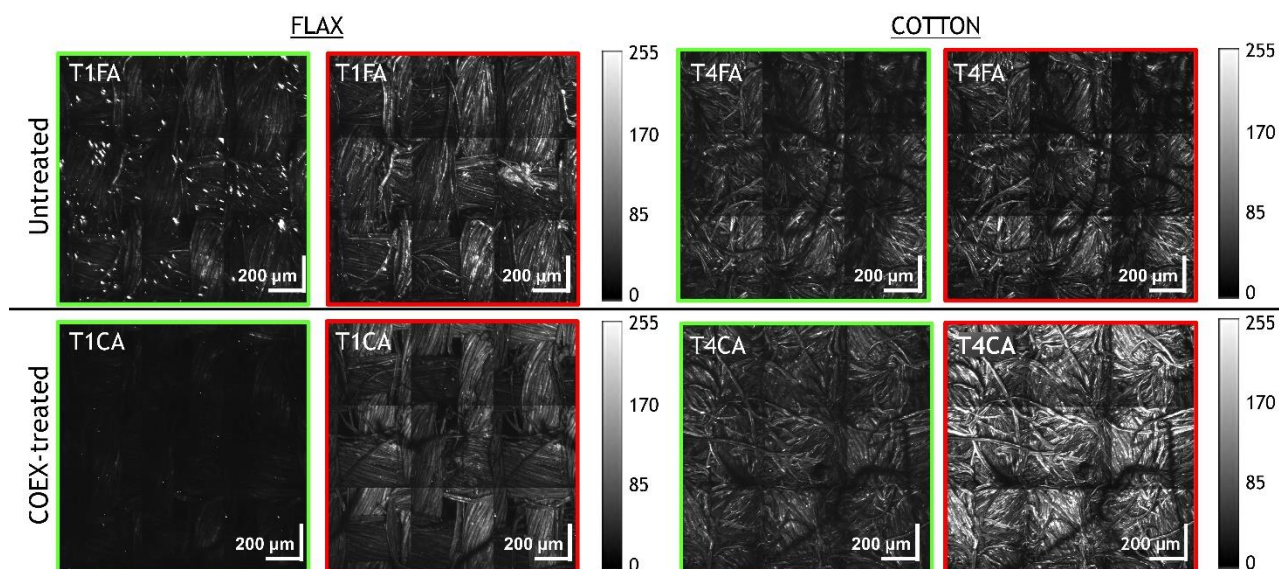

Fig. SM2. SHG and TPEF signal intensity measured on flax and cotton aged samples before (T1FA, T4FA) and after (T1CA, T4CA) flame-retardant treatment.
